# Supplementary material for: Structural revision of aristol: a fresh look at the oxidative coupling of thymol under iodination conditions
Source: Royal Society of Chemistry journal article supplement (doi:10.1039/c6ra11296j), 2016-01-01
Supplement: c6ra11296j1.pdf [file c6ra11296j1.pdf]

## Electronic supplementary information

for

Structural revision of aristol: a fresh look at the oxidative coupling of thymol under iodination conditions

Niko S. Radulović\*, Miljana R. Đorđević and Polina D. Blagojević

*Department of Chemistry, Faculty of Science and Mathematics, University of Niš,  
Višegradska 33, 18000, Niš, Serbia*

| <b>Table of Contents</b>                                                                                                                                 | page |
|----------------------------------------------------------------------------------------------------------------------------------------------------------|------|
| Table S1. Calculated (calc) and experimental (exp) values of chemical shifts of selected protons of compounds <b>10-13</b> and <b>16</b>                 | 2    |
| Table S2. List of all possible coupling products used in the QSPR study                                                                                  | 2-3  |
| Figure S1. <sup>1</sup> H NMR shifts of polar and "aromatic" protons of compounds <b>7</b> , <b>10-17</b> given in parallel                              | 4    |
| Figure S2. EI Mass spectrum of <b>14</b>                                                                                                                 | 4    |
| Figure S3. Spatial relationship between benzene ring shielding cones and protons placed above the plane of the ring (compounds <b>14</b> and <b>16</b> ) | 5    |
| Optimized geometry of compound <b>16</b>                                                                                                                 | 5    |
| Figure S4. The order of elution of aristol constituents from an SiO <sub>2</sub> column eluted by diethyl ether-hexane mixtures                          | 6    |
| Figure S5. Correlation between experimentally determined and calculated RI values according to a developed QSPR model                                    | 6    |
| Figure S6. Partial ion current chromatograms [35-52 min] of a sample of aristol                                                                          | 7    |
| Figure S7. <sup>1</sup> H and <sup>13</sup> C NMR spectra of compounds <b>7</b> , <b>10-17</b>                                                           | 8-16 |

---

\* Correspondence e-mail: [nikoradulovic@yahoo.com](mailto:nikoradulovic@yahoo.com).

Table S1. Calculated (calc) and experimental (exp) values of chemical shifts of selected protons of compounds **10-13** and **16**

| Position | <b>10</b>                 | <b>11</b> | <b>12</b> | <b>13</b> | <b>16</b> |
|----------|---------------------------|-----------|-----------|-----------|-----------|
|          | $\delta$ , ppm (calc/exp) |           |           |           |           |
| H2       | 6.64/6.57                 | /         | 6.49/6.66 | /         | 3.86/6.09 |
| H5       | 7.32/7.08                 | 7.17/7.05 | 7.33/7.54 | 7.19/7.57 | 7.85/7.59 |
| H6       | 6.97/6.73                 | 6.87/6.81 | /         | /         | /         |
| H2'      | /                         | /         | /         | /         | 6.55/6.61 |
| H5'      | /                         | /         | /         | /         | 6.99/6.89 |

Table S2. List of all possible coupling products used in the QSPR study, the predicted values of the retention indices and the corresponding QSPR variables

| Compound structure                                                                  | M <sup>a</sup><br>[g mol <sup>-1</sup> ] | Bp <sup>b</sup><br>[°C] | MTI <sup>c</sup> | RI <sub>pred</sub> <sup>d</sup> | Compound structure                                                                  | M<br>[g mol <sup>-1</sup> ] | Bp<br>[°C] | MTI  | RI <sub>pred</sub> |
|-------------------------------------------------------------------------------------|------------------------------------------|-------------------------|------------------|---------------------------------|-------------------------------------------------------------------------------------|-----------------------------|------------|------|--------------------|
| 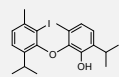  | 424                                      | 445.31                  | 8484             | 2666                            |   | 424                         | 468.09     | 9098 | 2823               |
|  | 424                                      | 445.31                  | 8524             | 2670                            |  | 550                         | 517.04     | 9570 | 2923               |
|  | 424                                      | 445.31                  | 8596             | 2678                            |  | 550                         | 517.04     | 9620 | 2929               |
|  | 550                                      | 494.25                  | 9040             | 2775                            |  | 550                         | 517.04     | 9626 | 2929               |
|  | 550                                      | 494.25                  | 9106             | 2782                            |  | 424                         | 468.09     | 8914 | 2804               |
|  | 550                                      | 494.25                  | 9156             | 2787                            |  | 424                         | 468.09     | 8920 | 2804               |
|  | 424                                      | 445.31                  | 8618             | 2680                            |  | 424                         | 468.09     | 8976 | 2810               |
|  | 424                                      | 445.31                  | 8646             | 2683                            |  | 550                         | 517.04     | 9430 | 2909               |
|  | 424                                      | 445.31                  | 8730             | 2692                            |  | 550                         | 517.04     | 9492 | 2915               |
|  | 550                                      | 494.25                  | 9168             | 2789                            |  | 550                         | 517.04     | 9498 | 2916               |
|  | 550                                      | 494.25                  | 9284             | 2801                            |  | 424                         | 445.31     | 9506 | 2773               |

|                                                                                     |     |        |      |      |                                                                                     |     |        |       |      |
|-------------------------------------------------------------------------------------|-----|--------|------|------|-------------------------------------------------------------------------------------|-----|--------|-------|------|
| 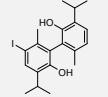   | 424 | 482.17 | 7932 | 2756 |    | 424 | 445.31 | 9512  | 2773 |
|    | 424 | 482.17 | 8188 | 2785 |    | 424 | 445.31 | 9528  | 2775 |
|    | 550 | 531.12 | 8454 | 2864 |    | 424 | 445.31 | 9640  | 2787 |
|    | 550 | 531.12 | 8710 | 2891 |    | 550 | 494.26 | 10056 | 2882 |
|    | 424 | 482.17 | 8054 | 2771 |    | 550 | 494.26 | 10078 | 2884 |
|    | 424 | 482.17 | 8066 | 2772 |    | 550 | 494.26 | 10084 | 2885 |
|    | 550 | 531.12 | 8582 | 2877 |    | 550 | 494.26 | 10194 | 2896 |
|   | 424 | 468.09 | 9048 | 2817 |   | 550 | 517.04 | 9430  | 2897 |
|  | 424 | 468.09 | 9054 | 2818 |  | 550 | 494.26 | 10206 | 2897 |

<sup>a</sup>M- molar mass, <sup>b</sup>Bp- predicted boiling points [°C], <sup>c</sup>MTI- molecular topological index, <sup>d</sup>Ripred- the predicted values of the retention indices

Figure S1.  $^1\text{H}$  NMR shifts of polar and "aromatic" protons of compounds **7**, **10-17** given in parallel; for clarity and uniformity reasons (signals of polar protons were not sharp singlets), simulated spectra (with experimentally observed values of coupling constants and chemical shifts) are shown. Signals in the gray rectangle correspond to protons that fall within the benzene shielding cone; signals with similar values of chemical shifts are grouped within cyan rectangles.

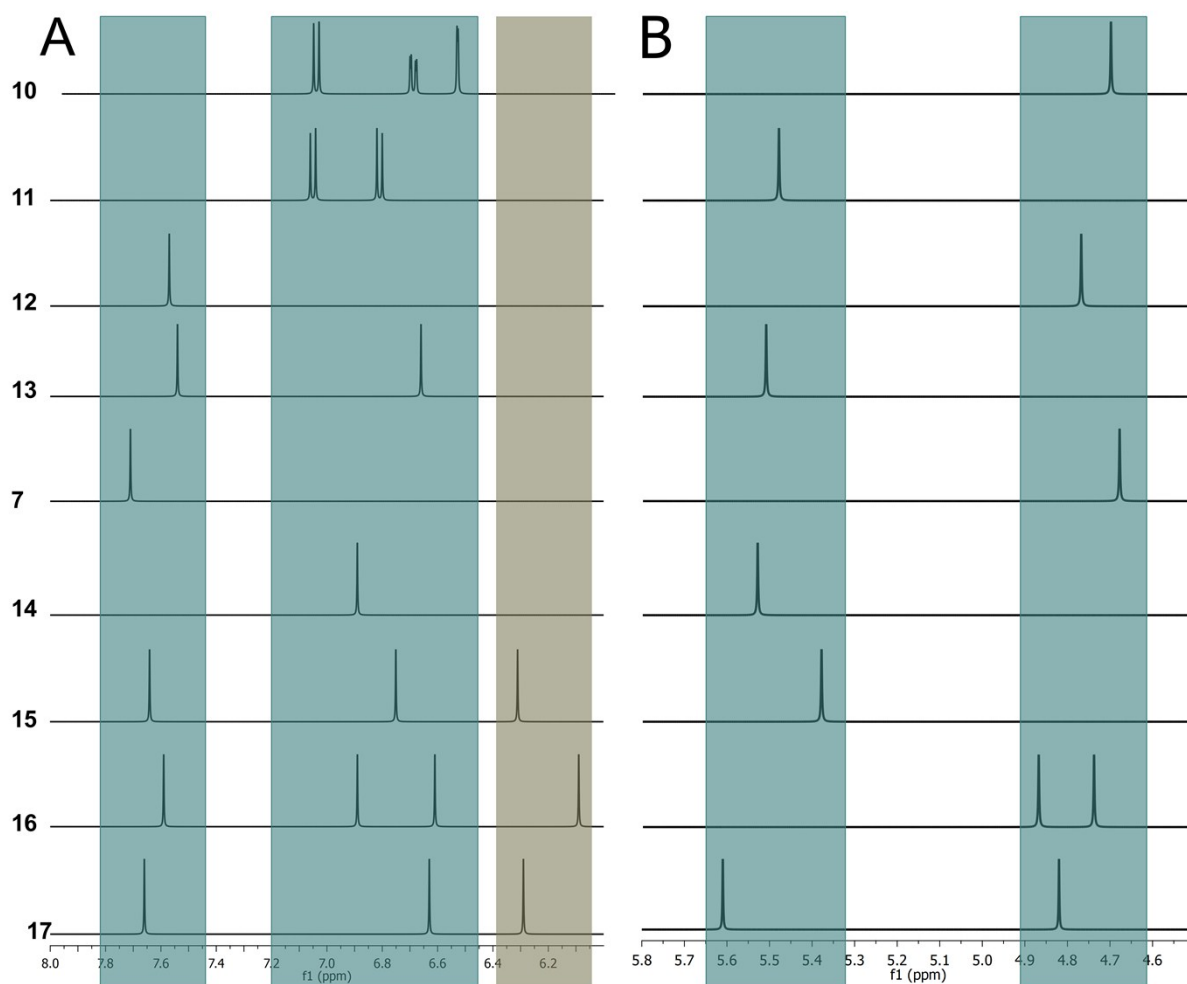

Figure S2. EI Mass spectrum of **14**

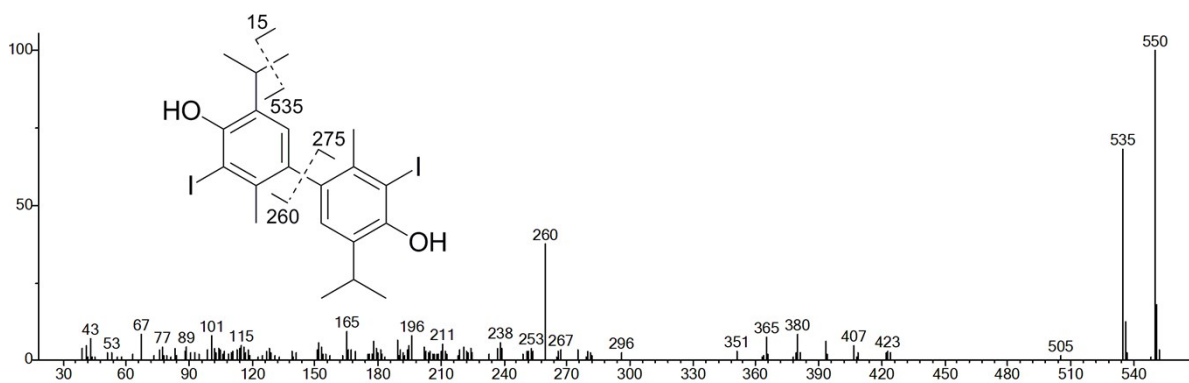

Figure S3. Spatial relationship between benzene ring shielding cones and protons placed above the plane of the ring (compound **14**)

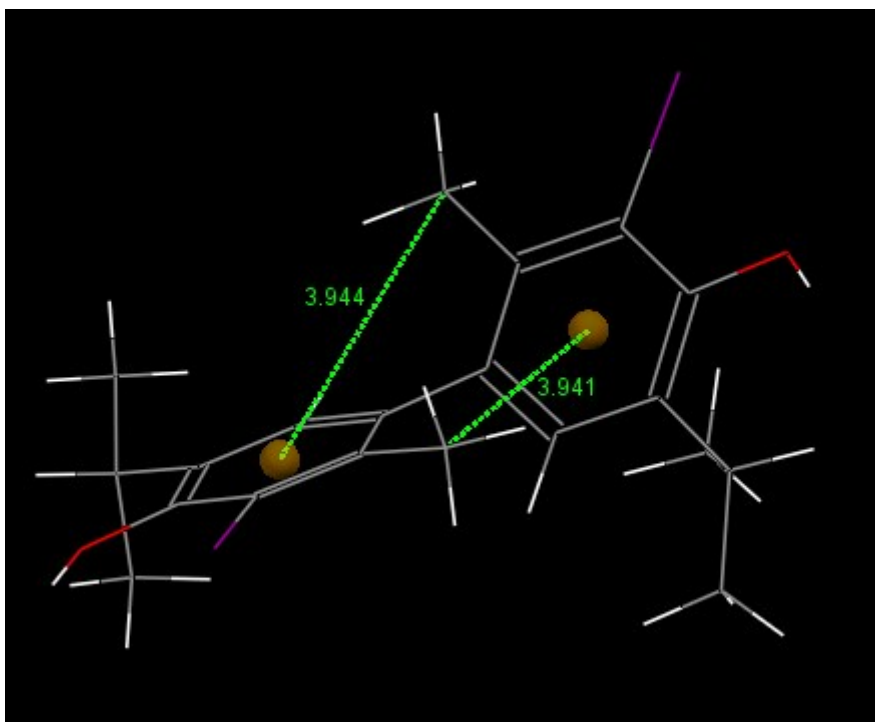

Optimized geometry (for optimization details see Experimental section) of compound **16**.

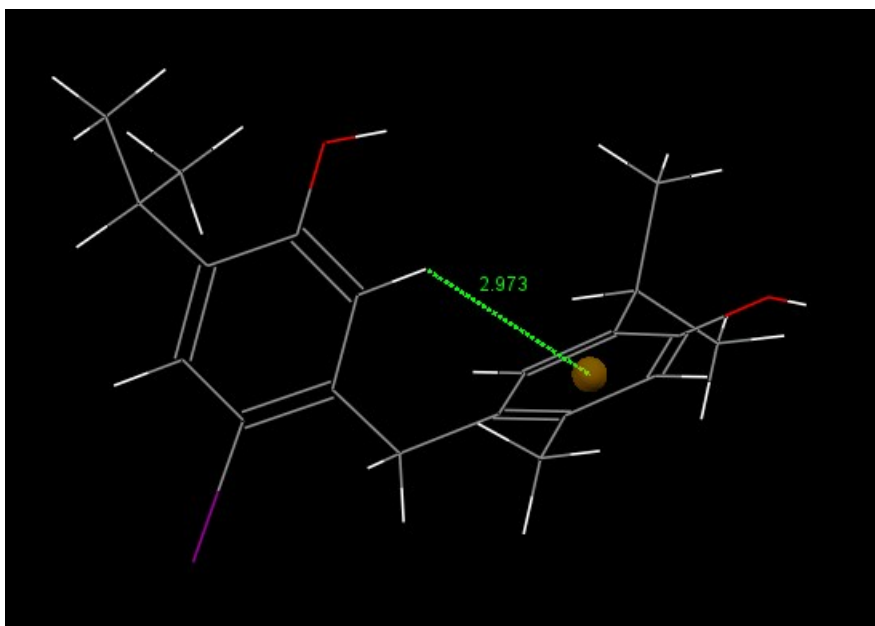

Figure S4. The order of elution of aristol constituents from an SiO<sub>2</sub> column eluted by diethyl ether-hexane mixtures

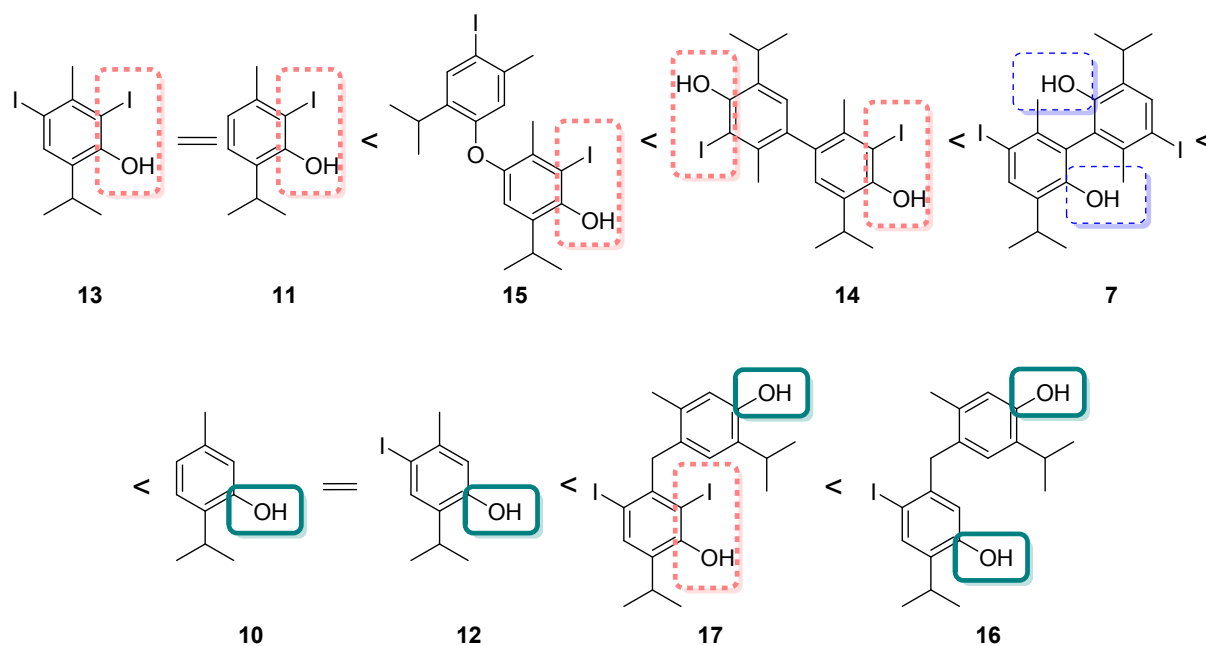

Figure S5. Correlation between experimentally determined and calculated RI values according to equation  $RI_{pred} = 116.09 + 4.07B_p + 0.10MTI - 147.55N_1$

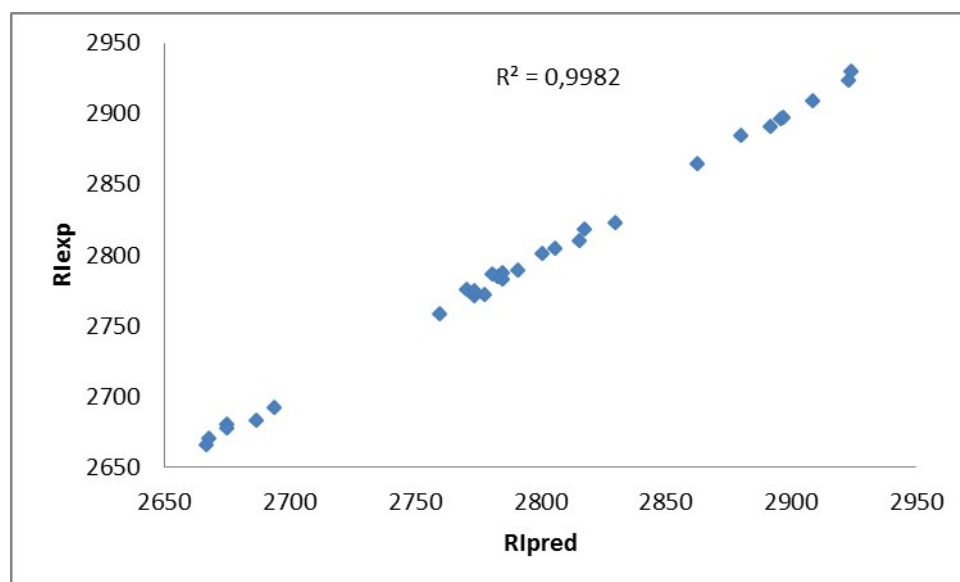

Figure S6. Partial ion current chromatograms [35-52 min] of a sample of aristol

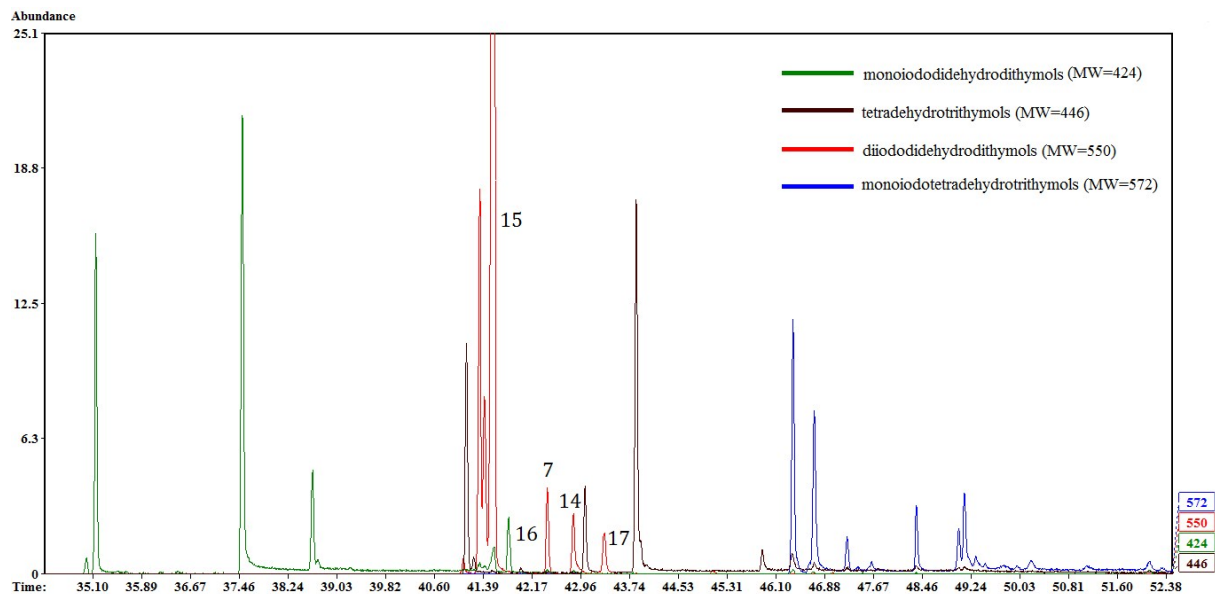

Figure S7.  $^1\text{H}$  and  $^{13}\text{C}$  NMR spectra of compounds **7**, **10-17**

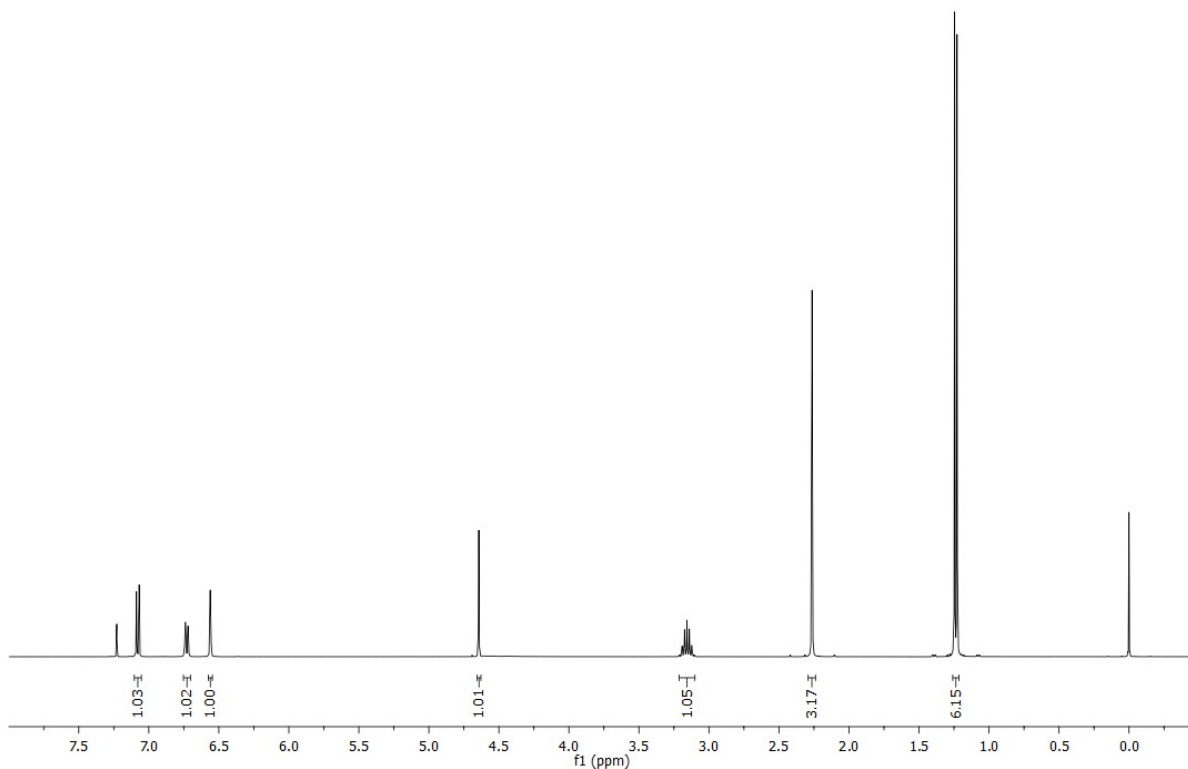

$^1\text{H}$  NMR (400 MHz) spectrum of compound **10** in  $\text{CDCl}_3$

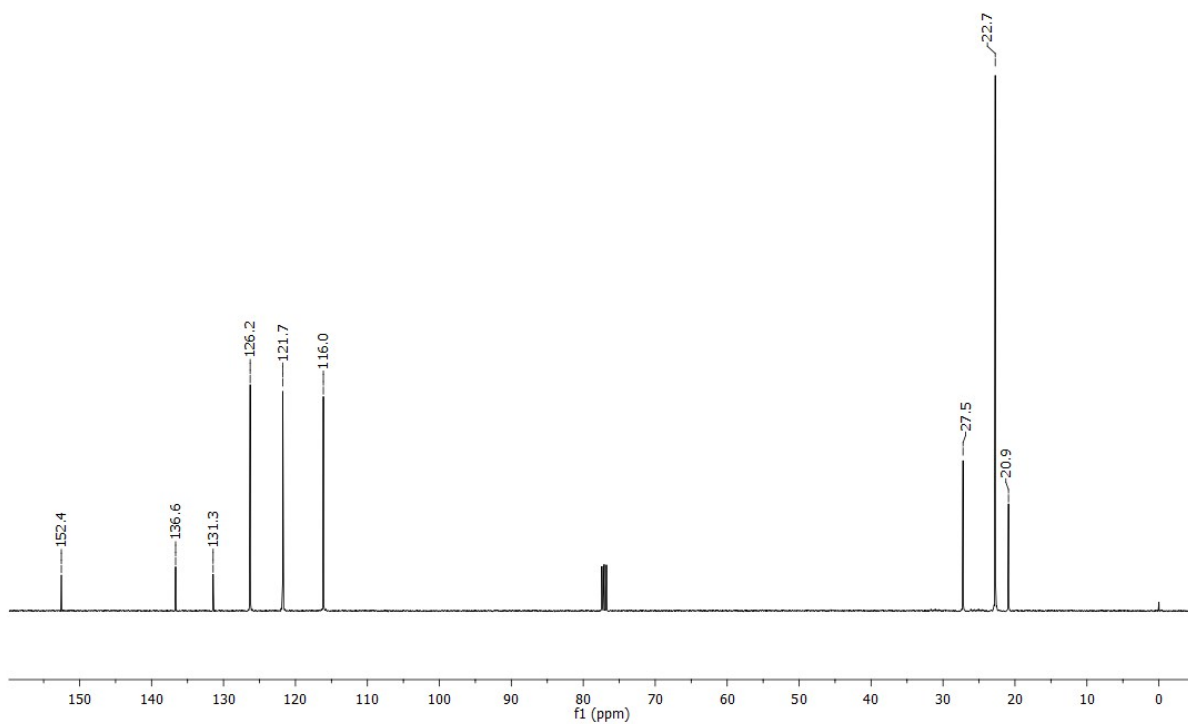

$^{13}\text{C}$  NMR (100 MHz) spectrum of compound **10** in  $\text{CDCl}_3$



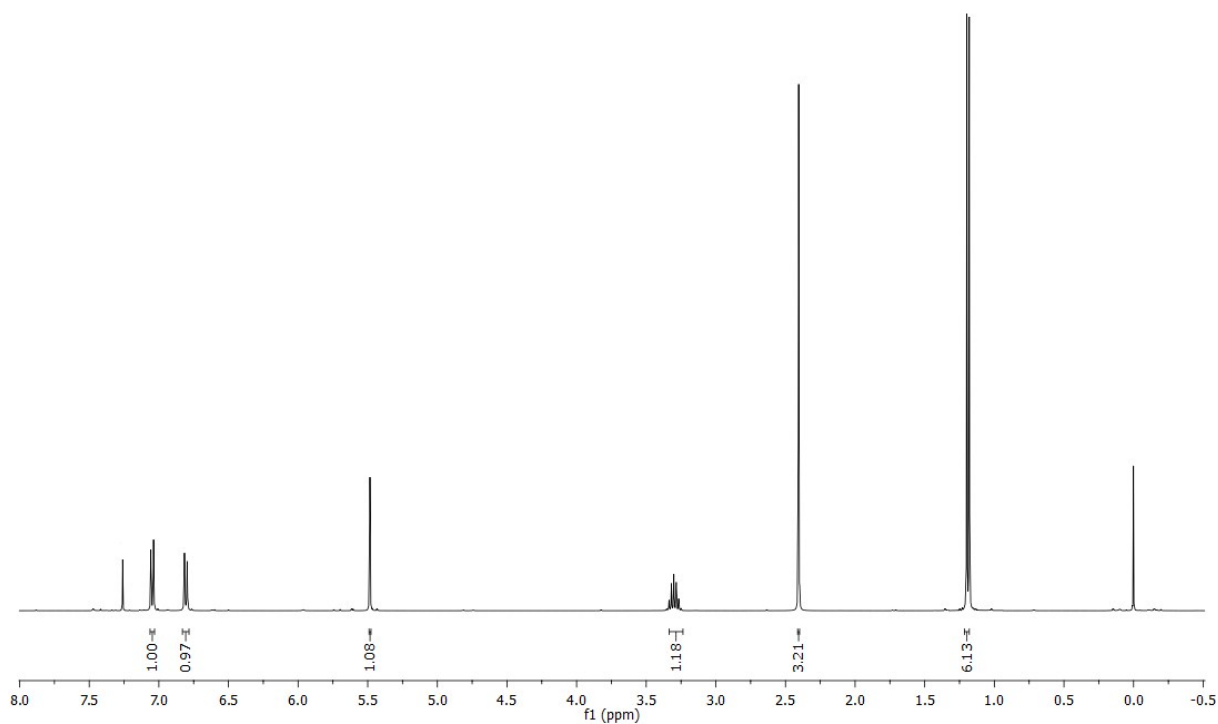

$^1\text{H}$  NMR (400 MHz) spectrum of compound **11** in  $\text{CDCl}_3$

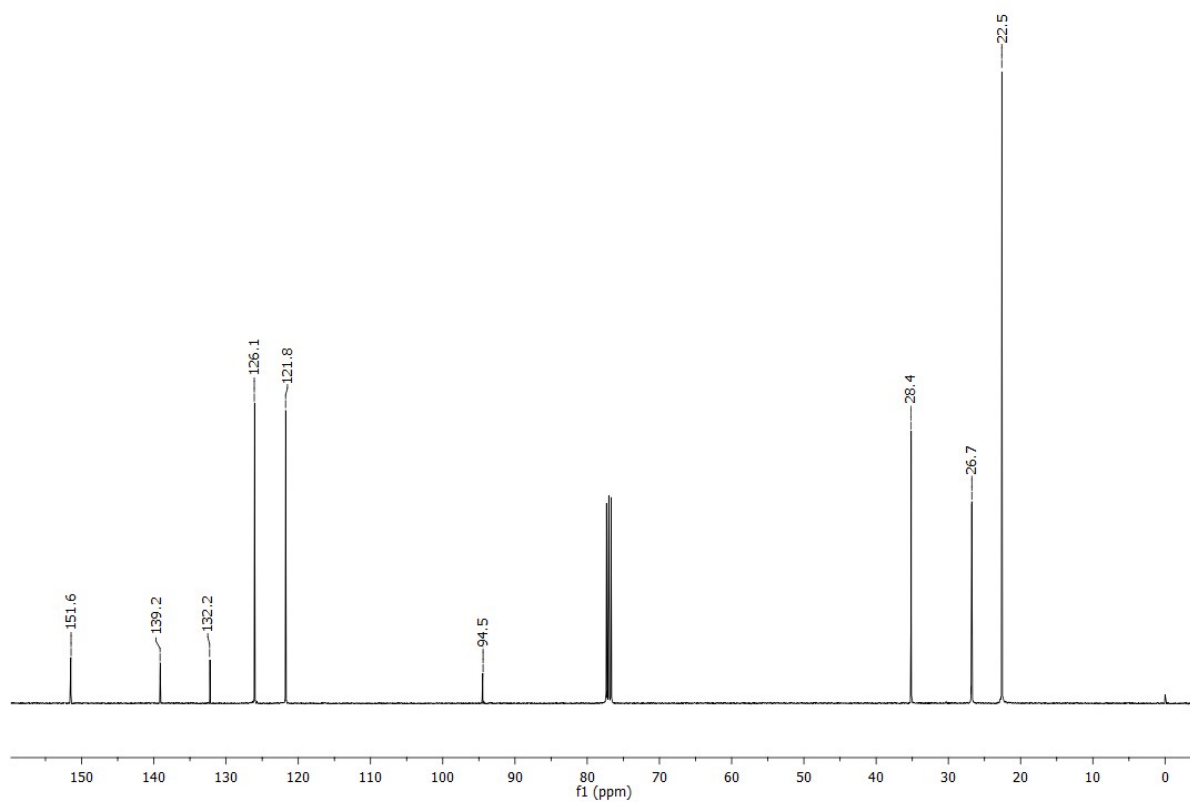

$^{13}\text{C}$  NMR (100 MHz) spectrum of compound **11** in  $\text{CDCl}_3$

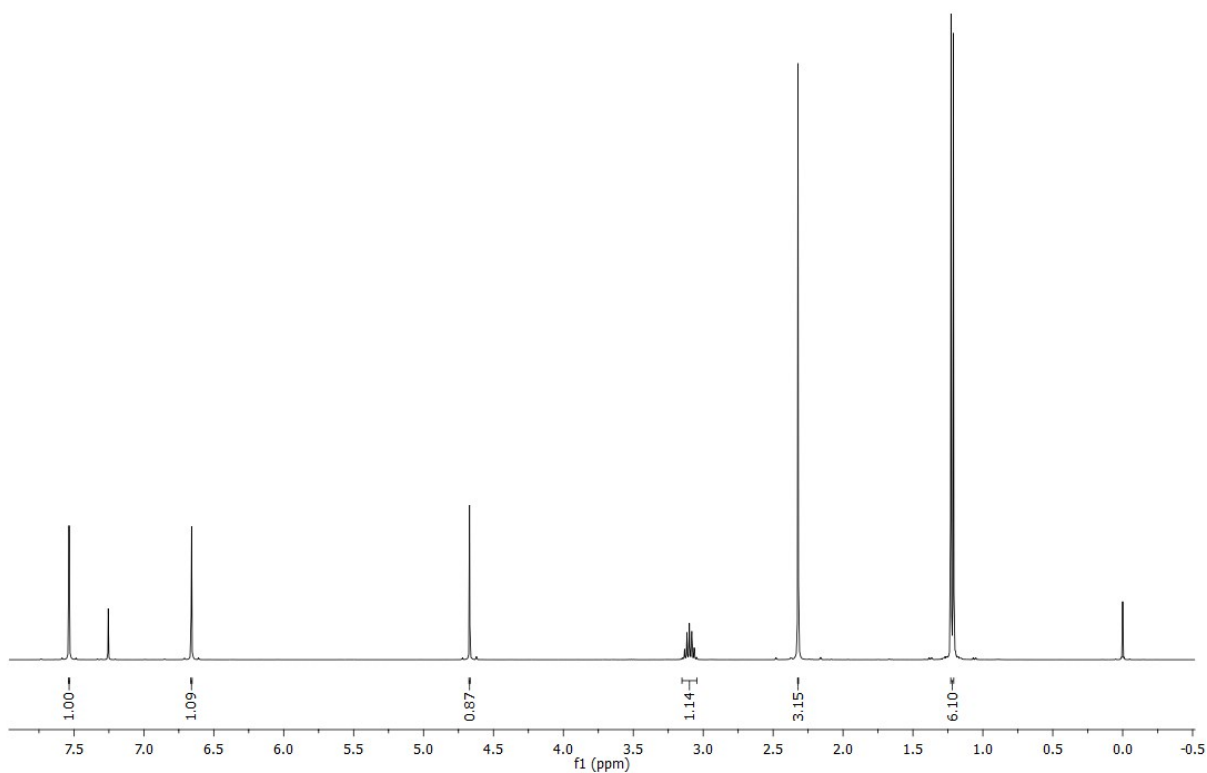

$^1\text{H}$  NMR (400 MHz) spectrum of compound **12** in  $\text{CDCl}_3$

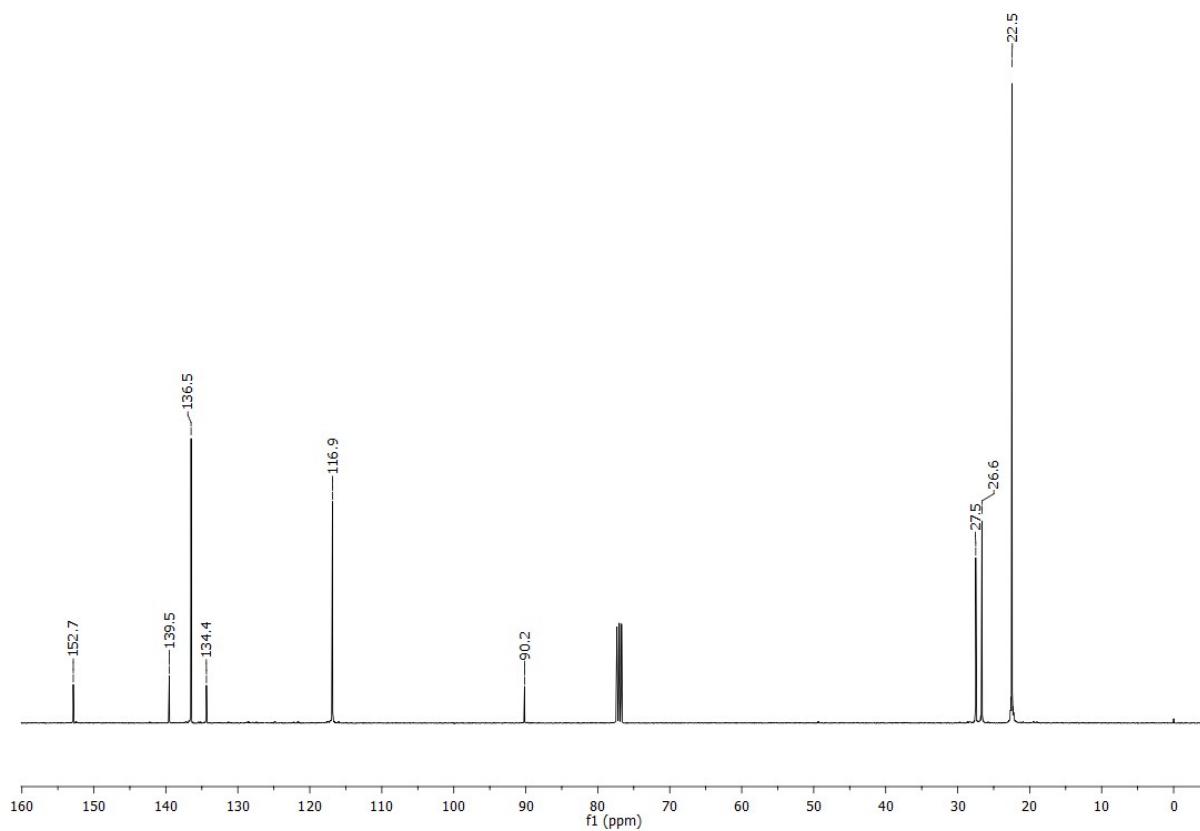

$^{13}\text{C}$  NMR (100 MHz) spectrum of compound **12** in  $\text{CDCl}_3$

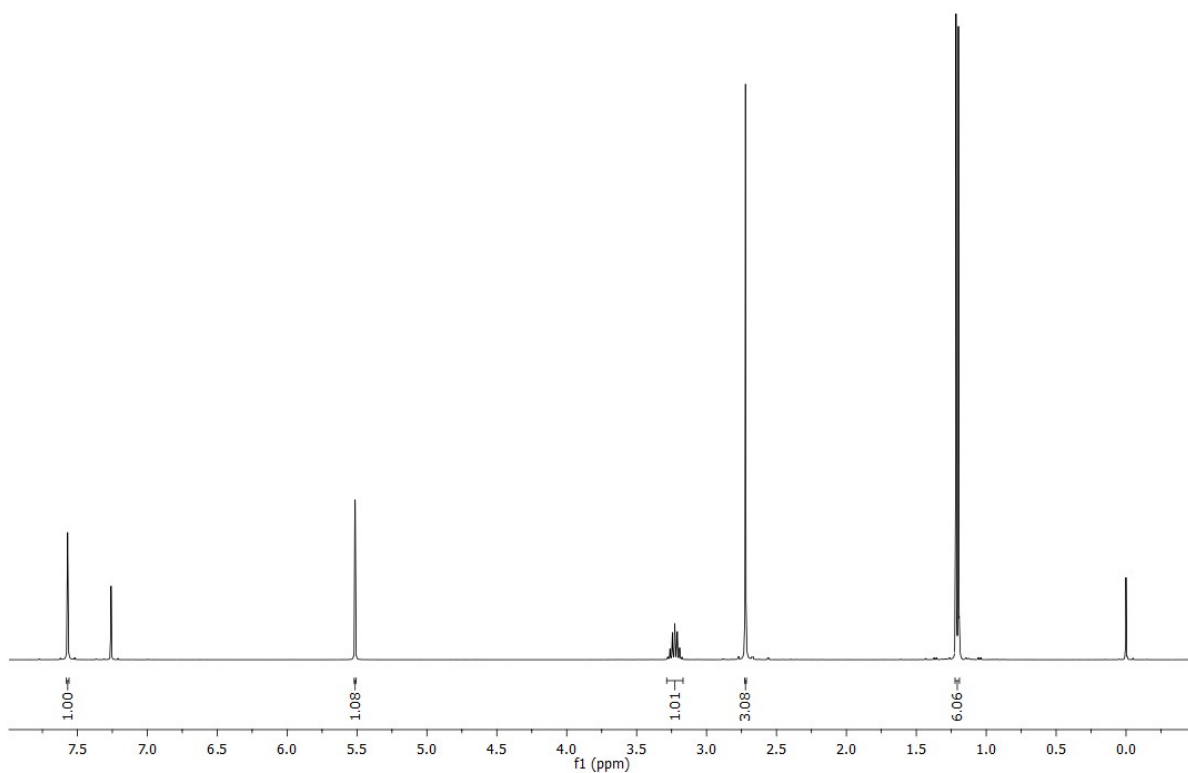

$^1\text{H}$  NMR (400 MHz) spectrum of compound **13** in  $\text{CDCl}_3$

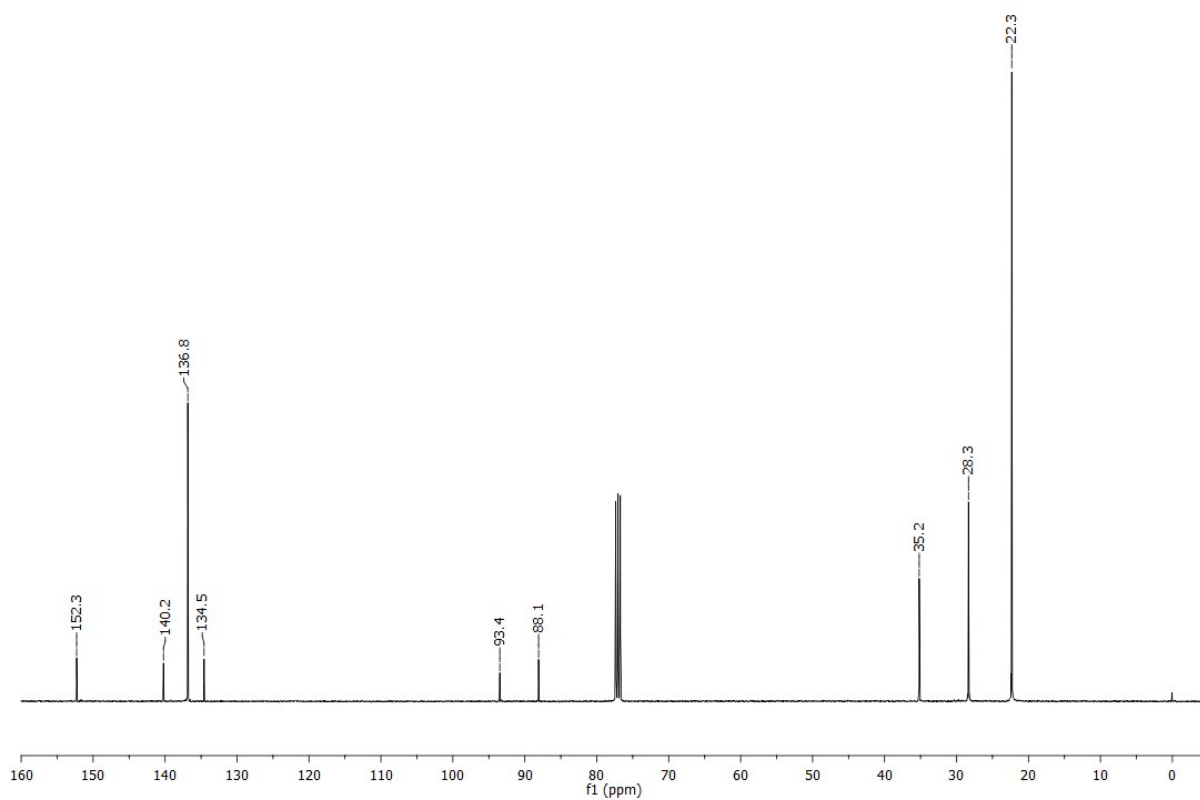

$^{13}\text{C}$  NMR (100 MHz) spectrum of compound **13** in  $\text{CDCl}_3$

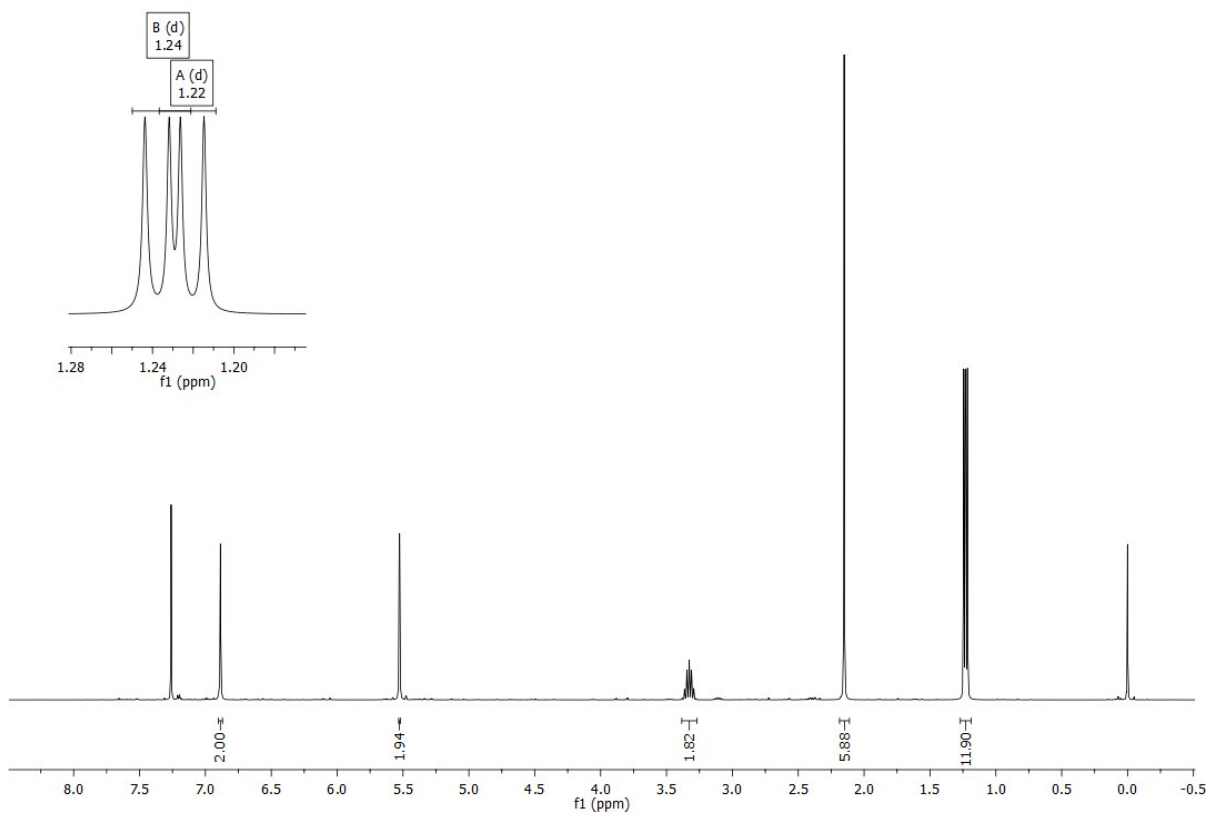

<sup>1</sup>H NMR (400 MHz) spectrum of compound **14** in CDCl<sub>3</sub>

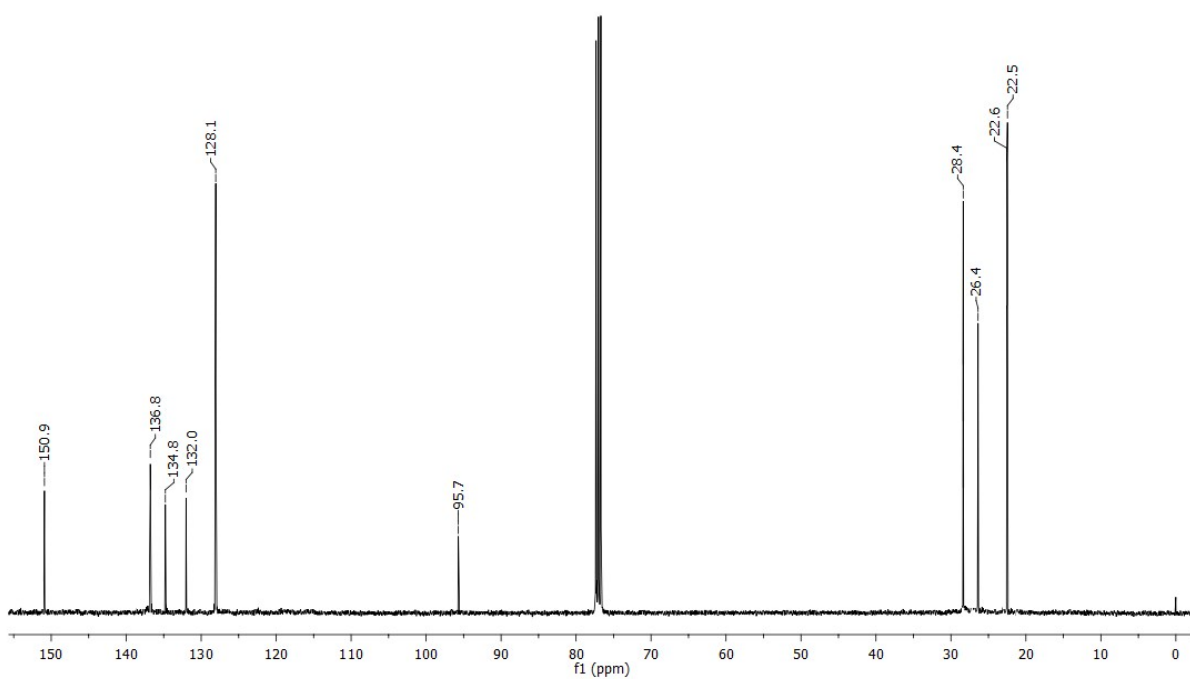

<sup>13</sup>C NMR (100 MHz) spectrum of compound **14** in CDCl<sub>3</sub>

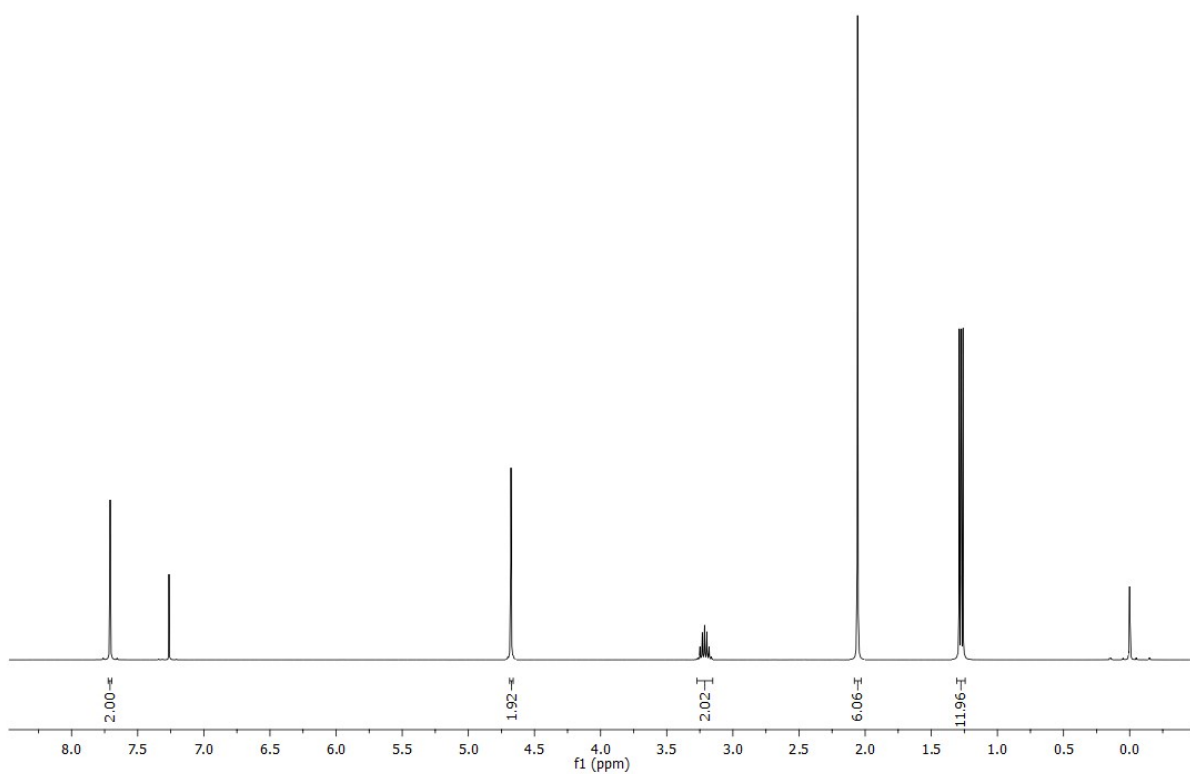

$^1\text{H}$  NMR (400 MHz) spectrum of compound **7** in  $\text{CDCl}_3$

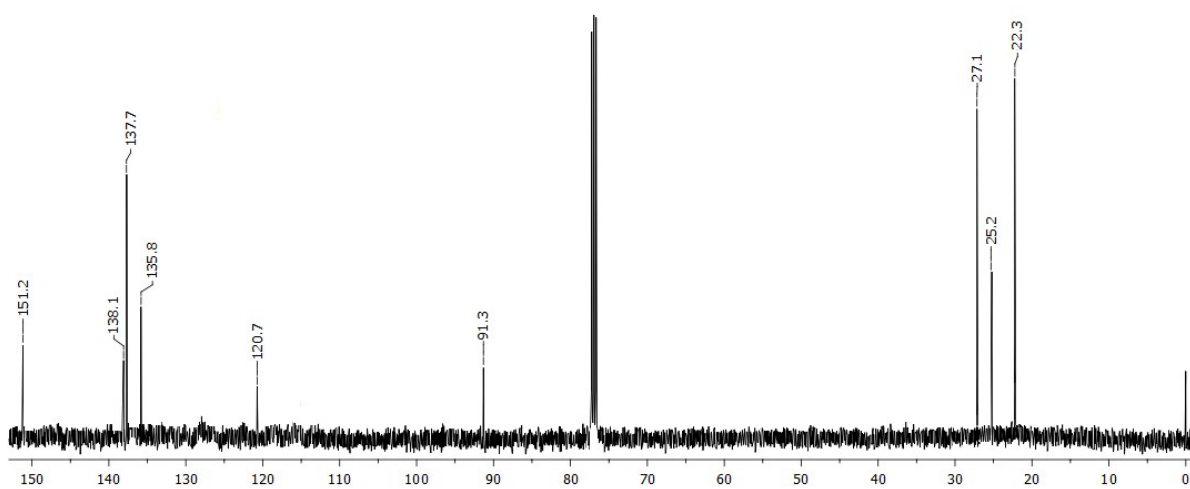

$^{13}\text{C}$  NMR (100 MHz) spectrum of compound **7** in  $\text{CDCl}_3$

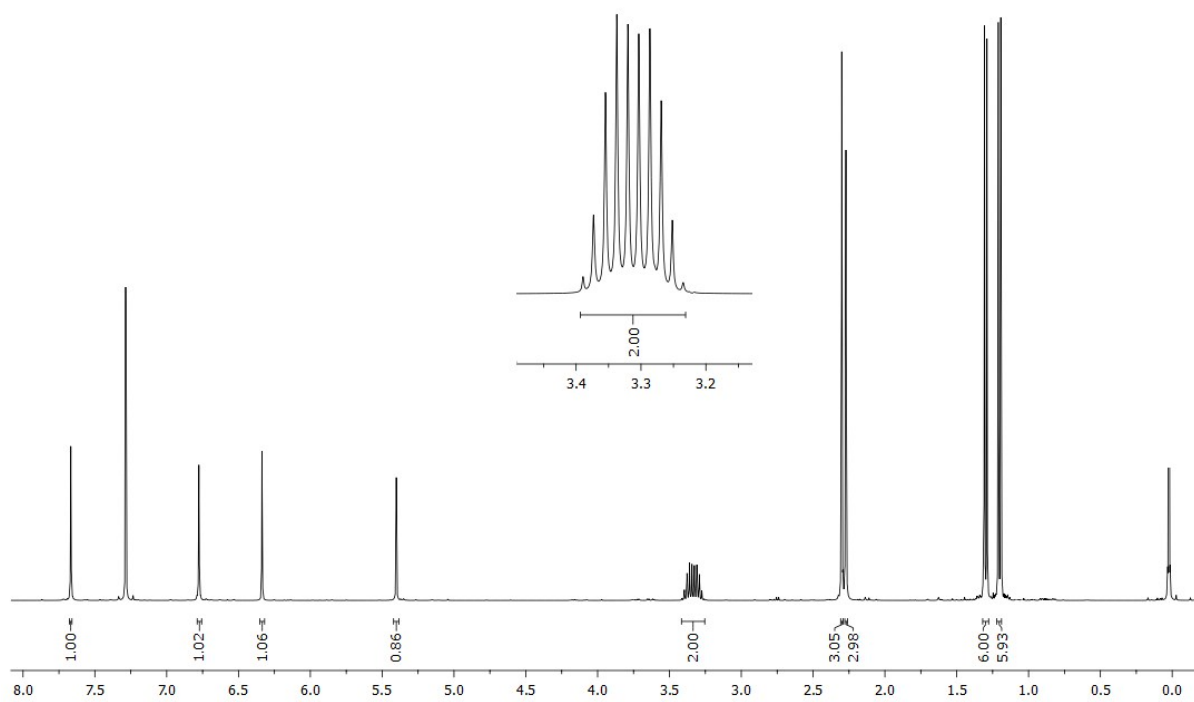

$^1\text{H}$  NMR (400 MHz) spectrum of compound **15** in  $\text{CDCl}_3$

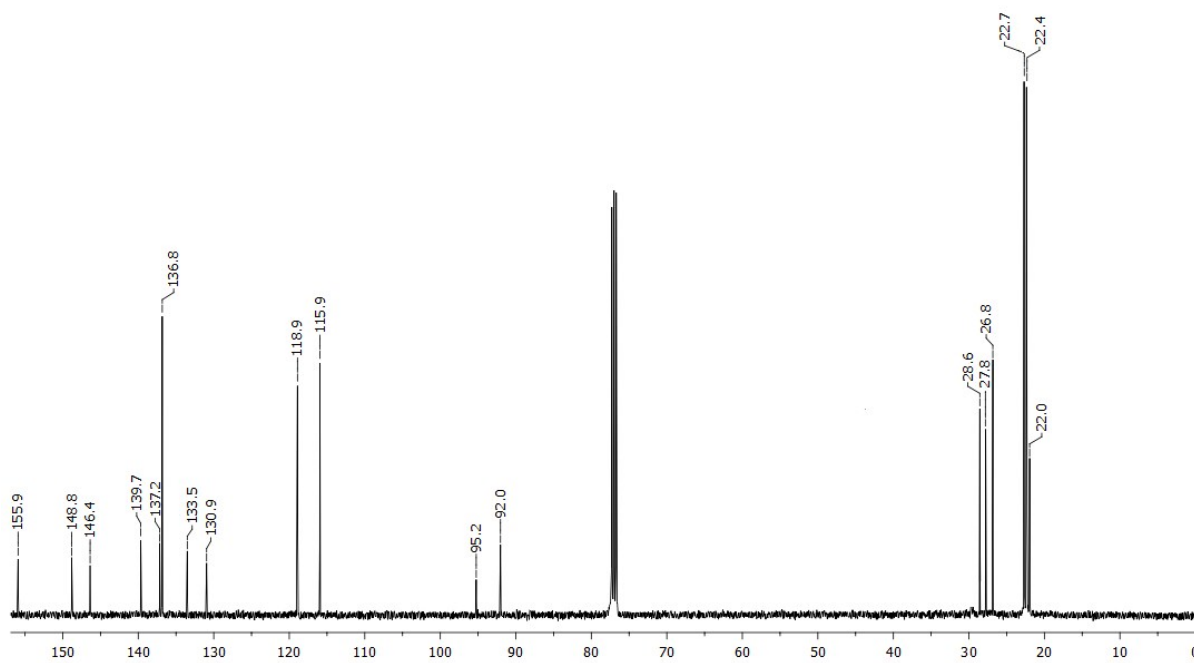

$^{13}\text{C}$  NMR (100 MHz) spectrum of compound **15** in  $\text{CDCl}_3$

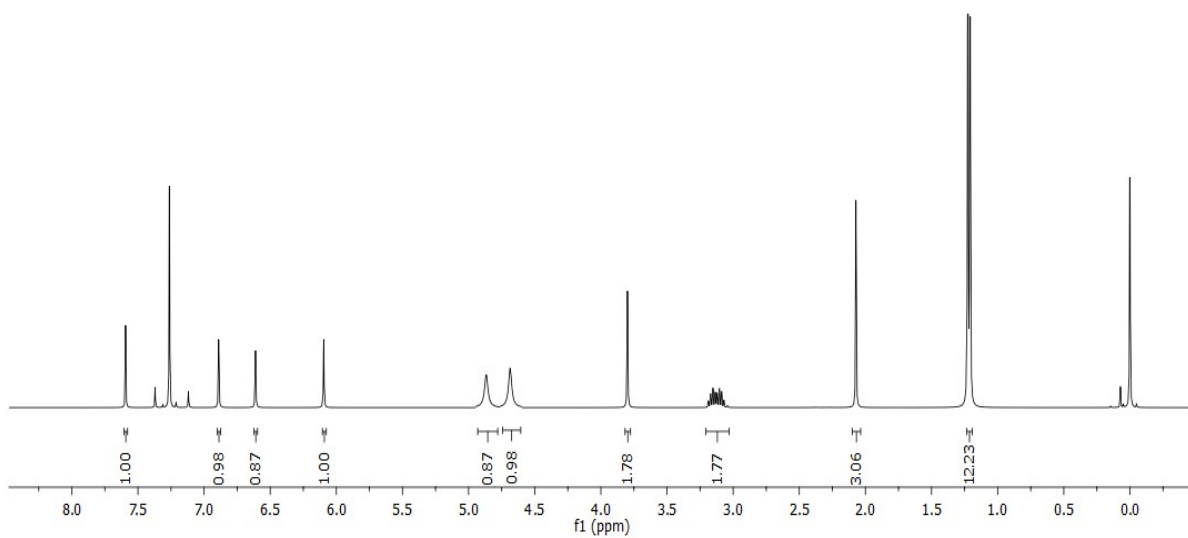

$^1\text{H}$  NMR (400 MHz) spectrum of compound **16** in  $\text{CDCl}_3$

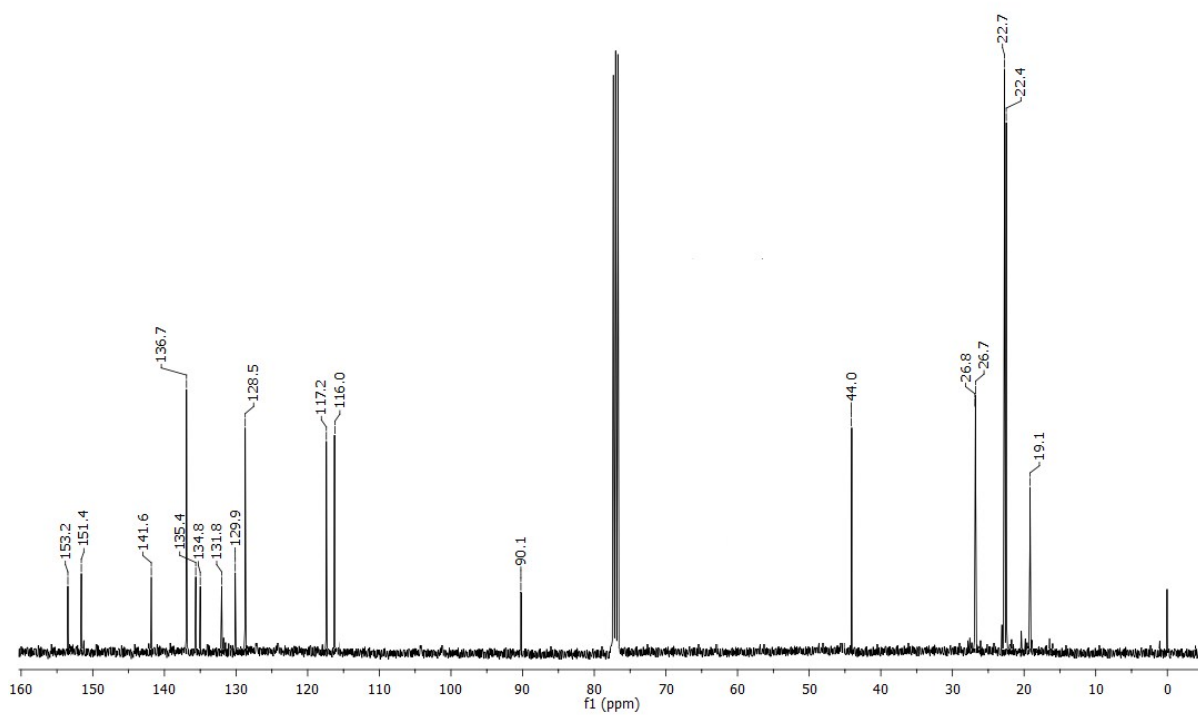

$^{13}\text{C}$  NMR (100 MHz) spectrum of compound **16** in  $\text{CDCl}_3$

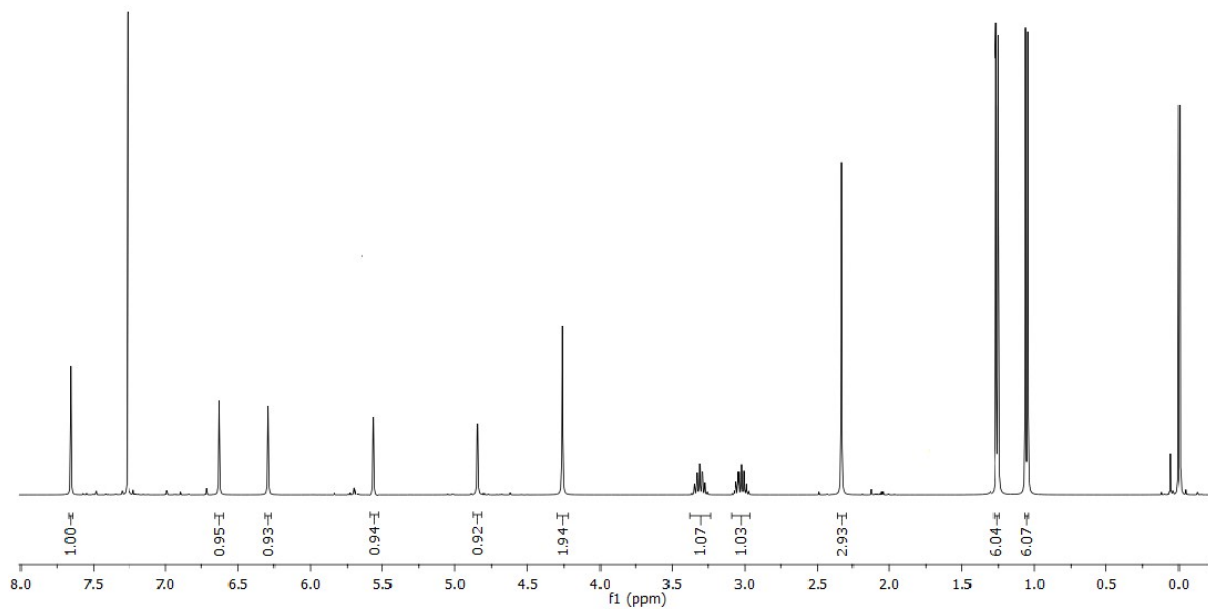

$^1\text{H}$  NMR (400 MHz) spectrum of compound **17** in  $\text{CDCl}_3$

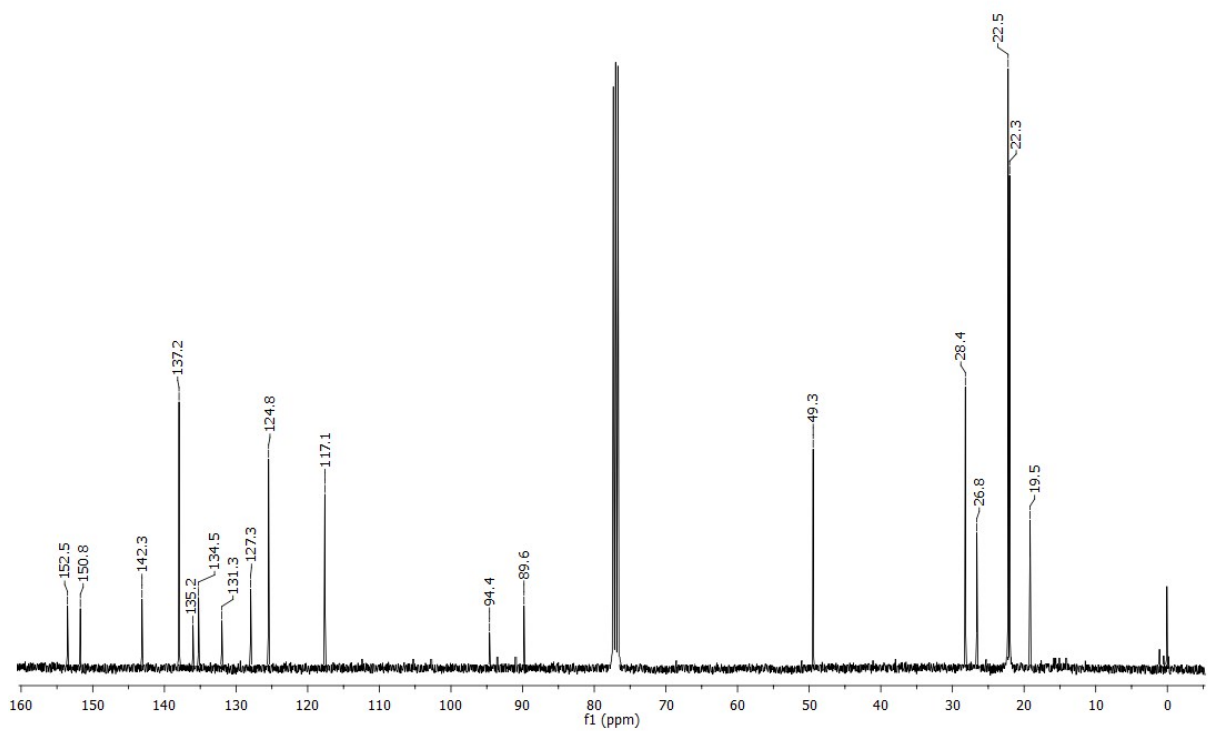

$^{13}\text{C}$  NMR (100 MHz) spectrum of compound **17** in  $\text{CDCl}_3$
